# Supplementary material for: Efficient Photocatalytic Degradation of Organic Pollutant in Wastewater by Electrospun Functionally Modified Polyacrylonitrile Nanofibers Membrane Anchoring TiO2 Nanostructured
Source: MDPI journal article supplement (doi:10.3390/membranes11100785), 2021-10-14
Supplement: s1 [file s1]

Supplementary Materials

# Efficient Photocatalytic Degradation of Organic Pollutant in Wastewater by Electrospun Functionally Modified Polyacrylonitrile Nanofibers Membrane anchoring TiO<sub>2</sub> Nanostructured

Fahad A. AlAbduljabbar <sup>1</sup>, Sajjad Haider <sup>2,\*</sup>, Fekri Abdulraqueb Ahmed Ali <sup>2</sup>, Abdulaziz A. Alghyamah <sup>2</sup>, Waheed A. Almasry <sup>2</sup>, Raj Patel <sup>1</sup> and Iqbal M. Mujtaba <sup>1,\*</sup>

<sup>1</sup> Department of Chemical Engineering, Faculty of Engineering & Informatics, University of Bradford, Bradford BD7 1DP, West Yorkshire, UK; thelastfahad@yahoo.com (F.A.A.); R.Patel@bradford.ac.uk (R.P.)

<sup>2</sup> Department of Chemical Engineering, College of Engineering, King Saud University, P.O. Box 800, Riyadh 11421, Saudi Arabia, Saudi Arabia; falhulidy@ksu.edu.sa (F.A.A.A.); aalghyamah@ksu.edu.sa (A.A.A.); walmasy@ksu.edu.sa (W.A.A.)

\* Correspondence: shaider@ksu.edu.sa; shaider@ksu.edu.sa (S.H.); Iqbal Mujtaba I.M.Mujtaba@bradford.ac.uk (I.M.M)

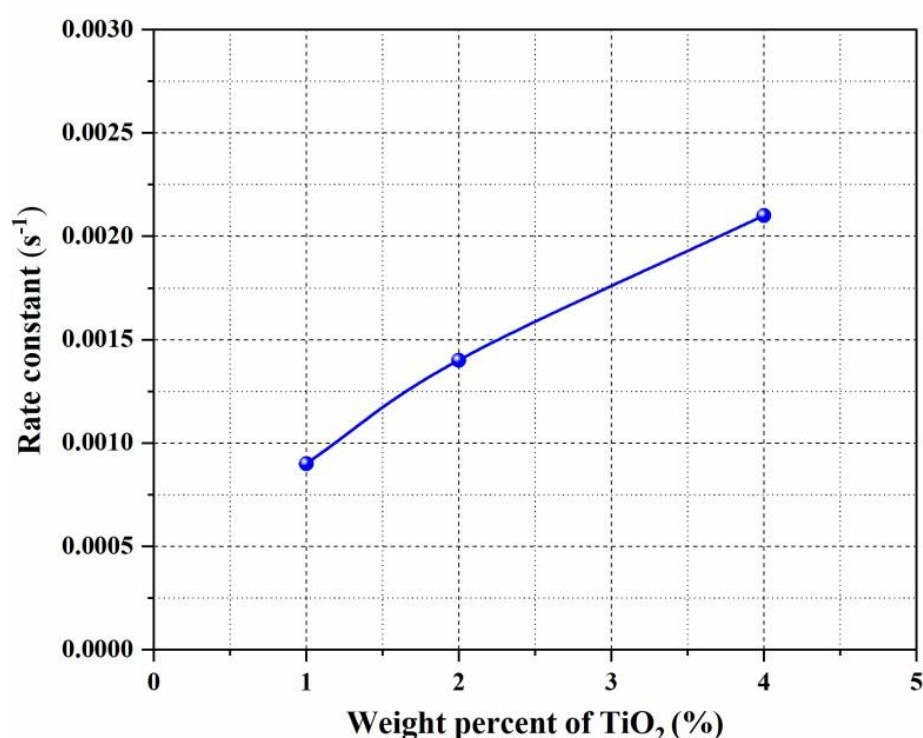

**Figure S1.** Rate constant for TiO<sub>2</sub> coated DETA-f-PAN NFs membrane with variation in wt.% of TiO<sub>2</sub>/PAN membrane Keeping the concentration of methyl orange 20 ppm and dose 60 mg.

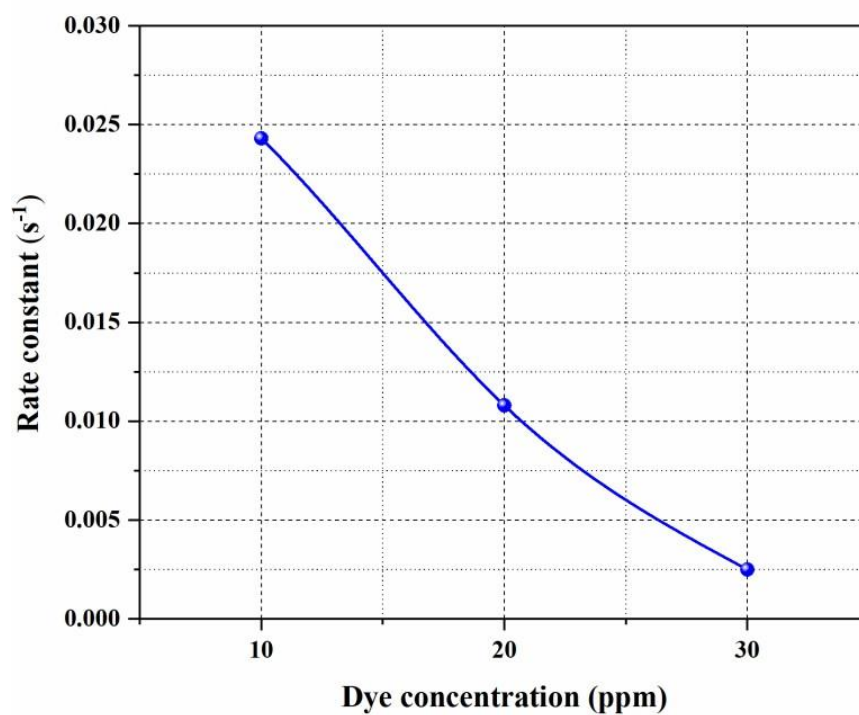

**Figure S2.** Rate constant for TiO<sub>2</sub> coated DETA-f-PAN NFs membrane with variation in membrane concentration of methyl orange keeping the dose constant (60 mg).

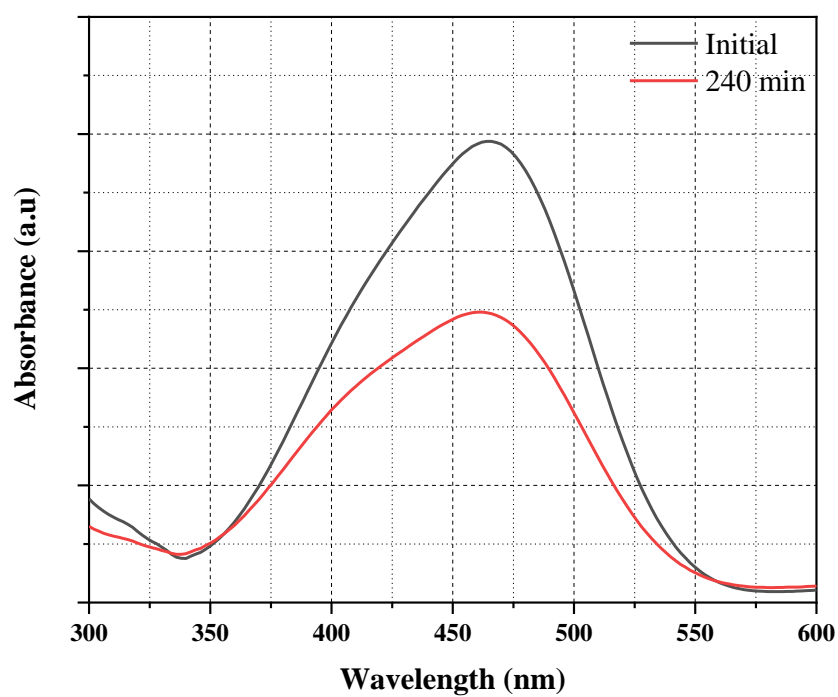

**Figure S3.** Spectrophotometer spectra of the 20 ppm methyl orange at 0 min and 240 min. TiO<sub>2</sub> NPs dose was 60 mg.

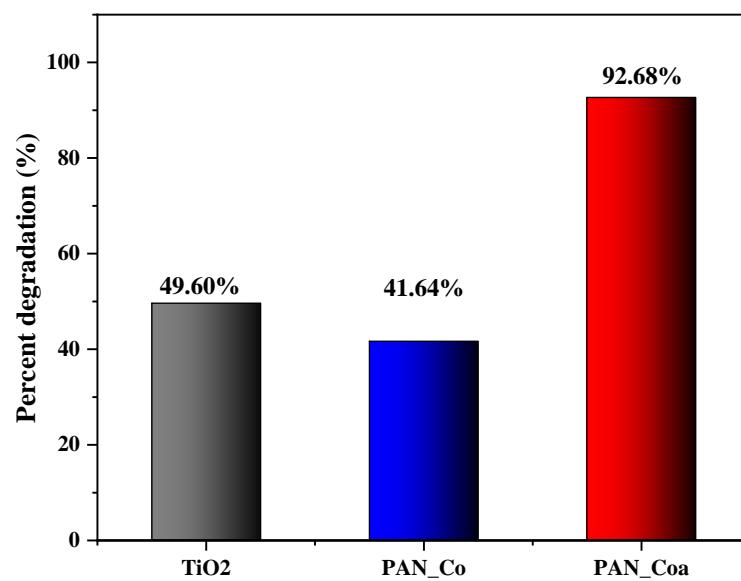

**Figure S4.** Comparative data of the bare TiO<sub>2</sub> NPs, PAN\_Co and PAN\_Coa at 20 ppm methyl orange and 60 mg dose.
